# Supplementary material for: Psoralea corylifolia L. Seed Extract Attenuates Diabetic Nephropathy by Inhibiting Renal Fibrosis and Apoptosis in Streptozotocin-Induced Diabetic Mice
Source: MDPI journal article supplement (doi:10.3390/nu9080828), 2017-08-02
Supplement: s1 [file s1]

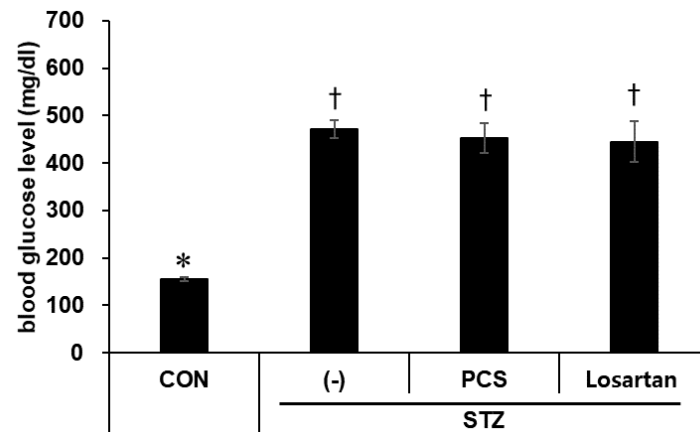

Fig. S1. Blood glucose levels in STZ-induced diabetic mice treated with PCS extract. Mice were injected with vehicle (CON) or STZ (50 mg/kg/day) for 5 consecutive days. STZ-induced diabetic mice (blood glucose levels > 300 mg/dl) were treated with vehicle (-), PCS extract (500 mg/kg/day) or losartan potassium (10 mg/kg/day) as a positive control for 8 weeks (n= 8-11/group) and blood glucose levels were determined. †,  $p < 0.05$  vs. CON mice. \*,  $p < 0.05$  vs. (-)/STZ mice.

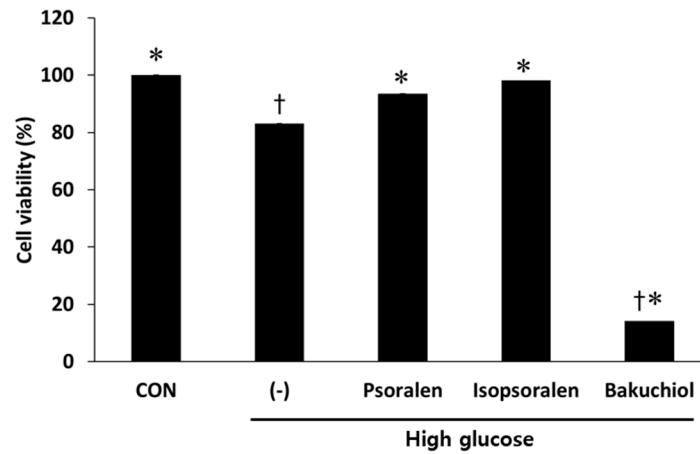

Fig. S2. Cell viability in SV40 MES-13 cells treated with 4  $\mu\text{g/ml}$  of psoralen, isopsoralen or bakuchiol. SV40 MES-13 cells were treated with 4  $\mu\text{g/ml}$  of psoralen, isopsoralen or bakuchiol for 24 h in the presence of high glucose concentration (25 mM). Cell viability was determined by CCK8 assay. †,  $p < 0.05$  vs. CON. \*,  $p < 0.05$  vs. (-)/High glucose.
